# Supplementary material for: The expression of Rab5 and its effect on invasion, migration and exosome secretion in triple negative breast cancer
Source: PubMed Central journal article supplement — Korean J Physiol Pharmacol. 2023 Mar 1;27(2):157–65. doi: 10.4196/kjpp.2023.27.2.157 (PMC9968947; doi:10.4196/kjpp.2023.27.2.157), 2023-03-01
Supplement: kjpp-27-2-157-supple.pdf [file kjpp-27-2-157-supple.pdf]

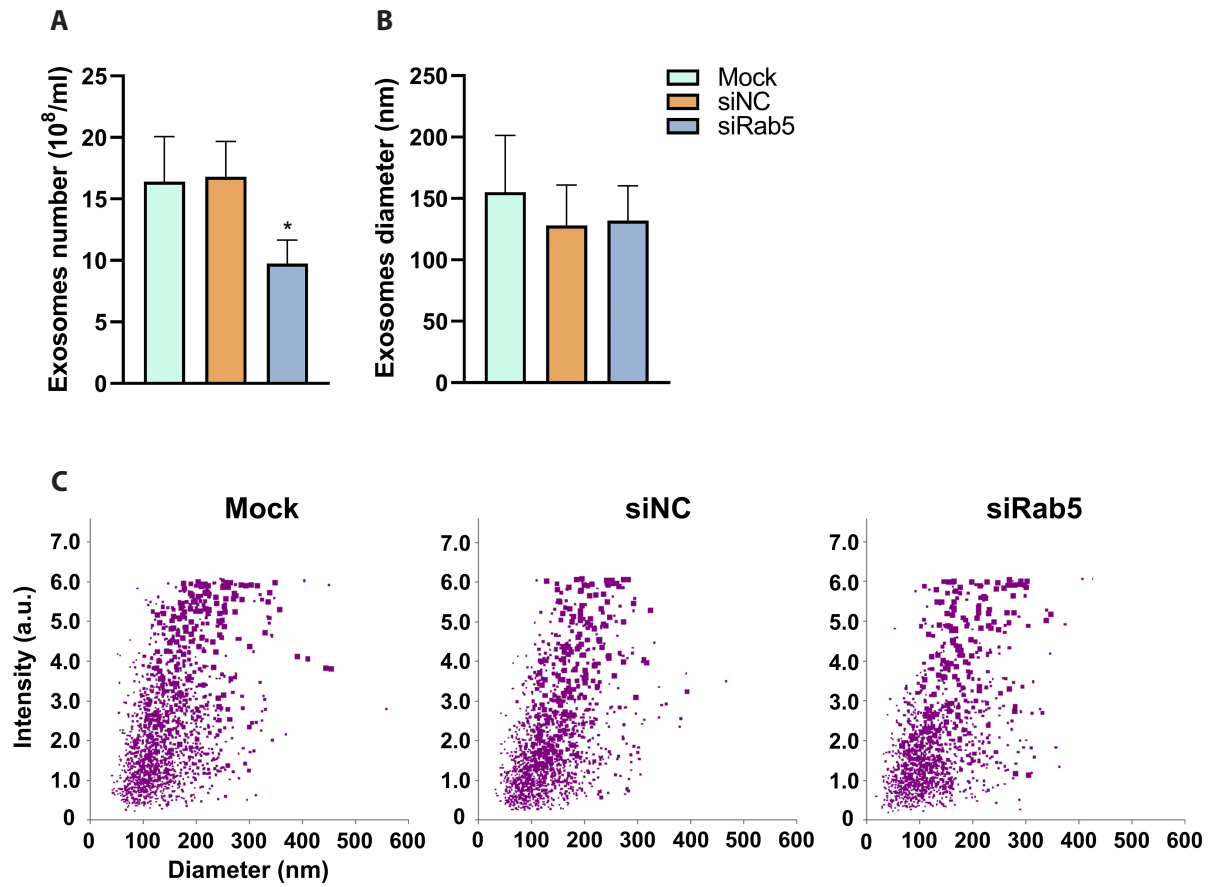

**Supplementary Fig. 1. The characteristics of the exosomes isolated from MDA-MB-231 cells.** The number (A) and diameter (B), and size distribution (C) of exosomes isolated from MDA-MB-231 cells without transfection or with transfection with siNC and siRab5;  $n = 3$ . Data was represented as mean  $\pm$  SD. \* $p < 0.05$ .
